# Supplementary material for: Development of sustainable fluorous chemistry: the synthesis and characterization of fluorous ethers with nonafluoro-tert-butoxy groups
Source: Royal Society of Chemistry journal article supplement (doi:10.1039/c4qo00192c), 2014-10-13

Electronic Supplementary Material (ESI) for Organic Chemistry Frontiers.

**Development of Sustainable Fluorous Chemistry: The Synthesis and Characterization of Fluorous Ethers and Diethers with Nonfluoro-tert-butoxy Groups**

See-Wing Lo,<sup>a</sup> Edwin Law,<sup>a</sup> Matthew Y. Lui,<sup>a</sup> Xi-Guang Wei,<sup>a</sup> Kai-Chung Lau,<sup>a,\*</sup> Chui Y. Ma,<sup>a,b</sup> Margaret B. Murphy,<sup>a,b,\*</sup> and István T. Horváth<sup>a,\*</sup>

<sup>a</sup>Department of Biology and Chemistry, City University of Hong Kong, Tat Chee Avenue, Kowloon, Hong Kong

<sup>b</sup>State Key Laboratory in Marine Pollution, City University of Hong Kong, Tat Chee Ave., Kowloon, Hong Kong

1

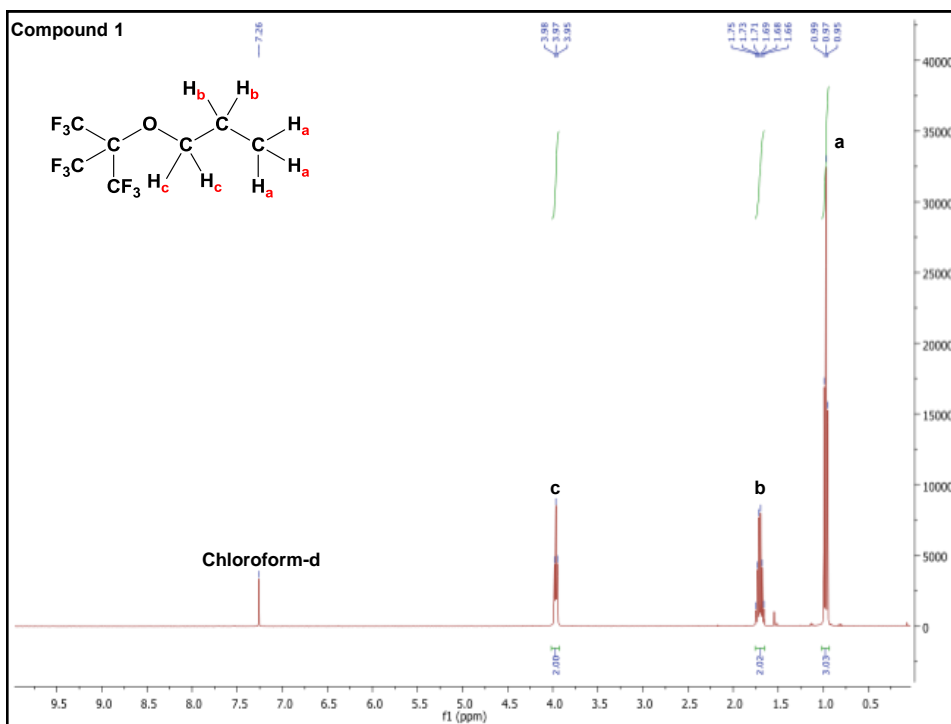

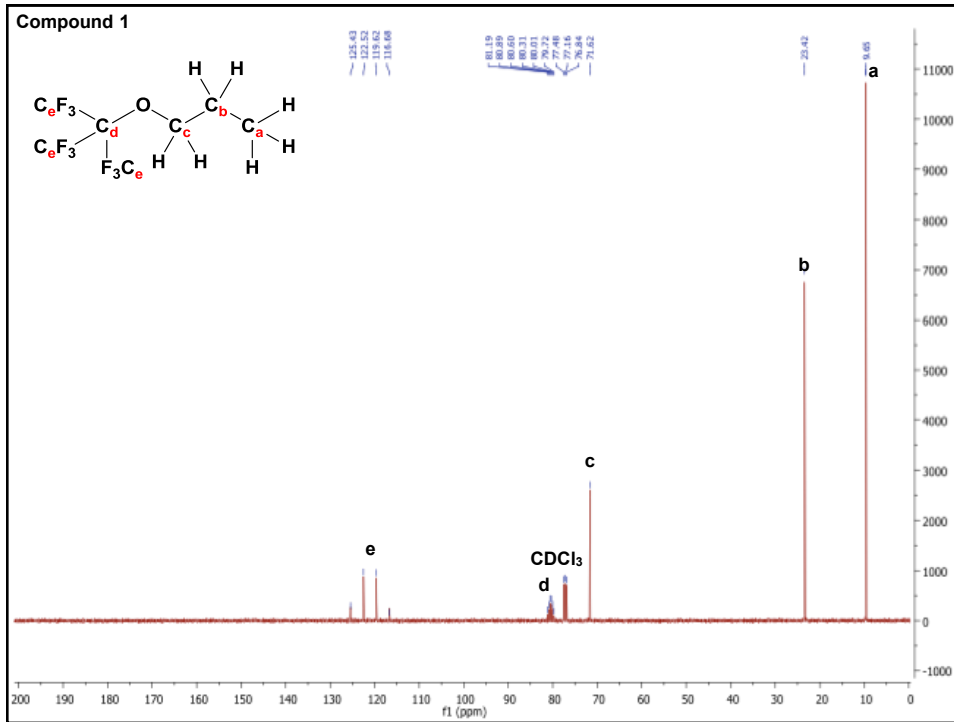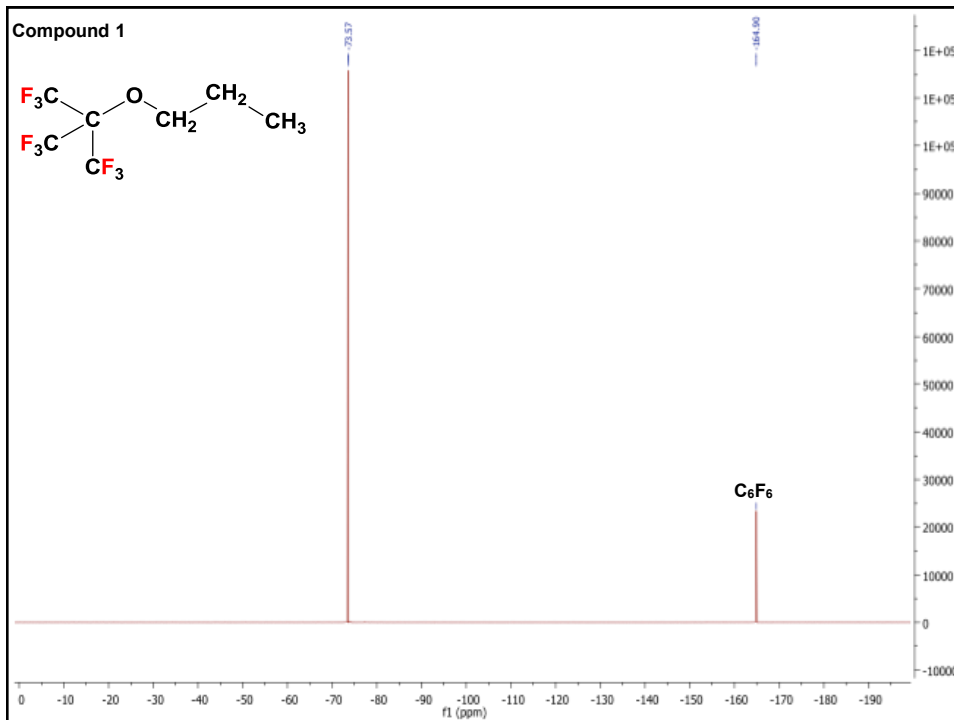

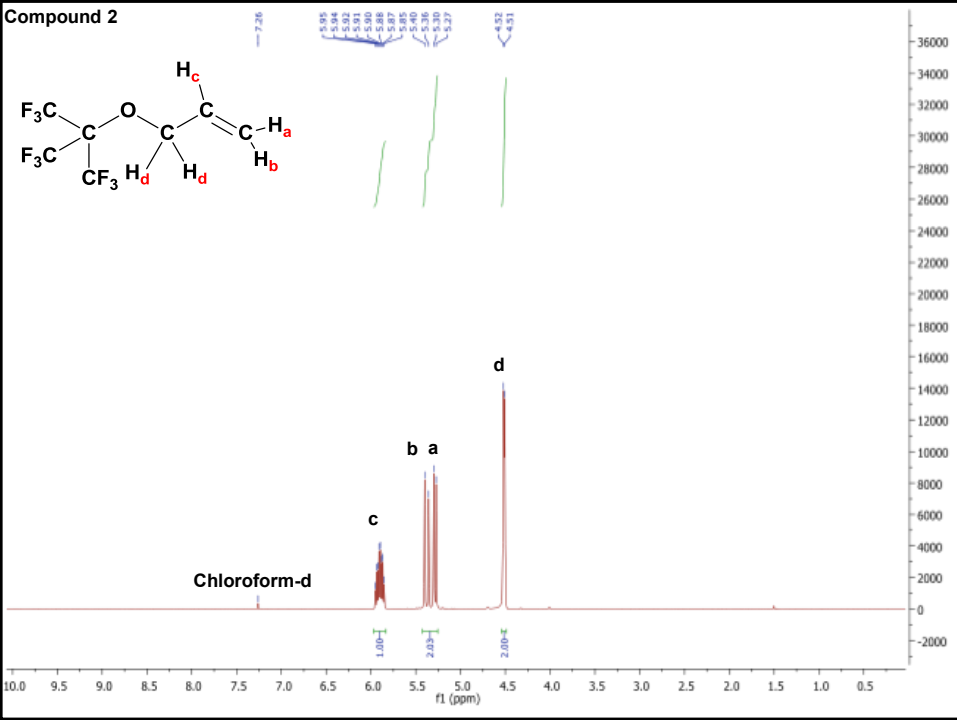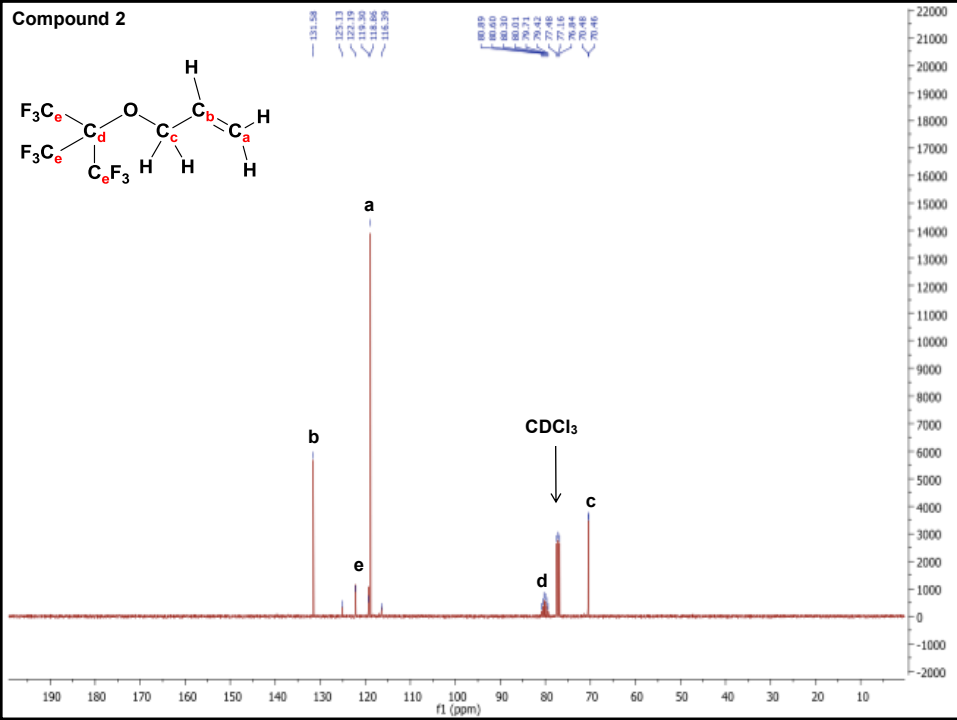

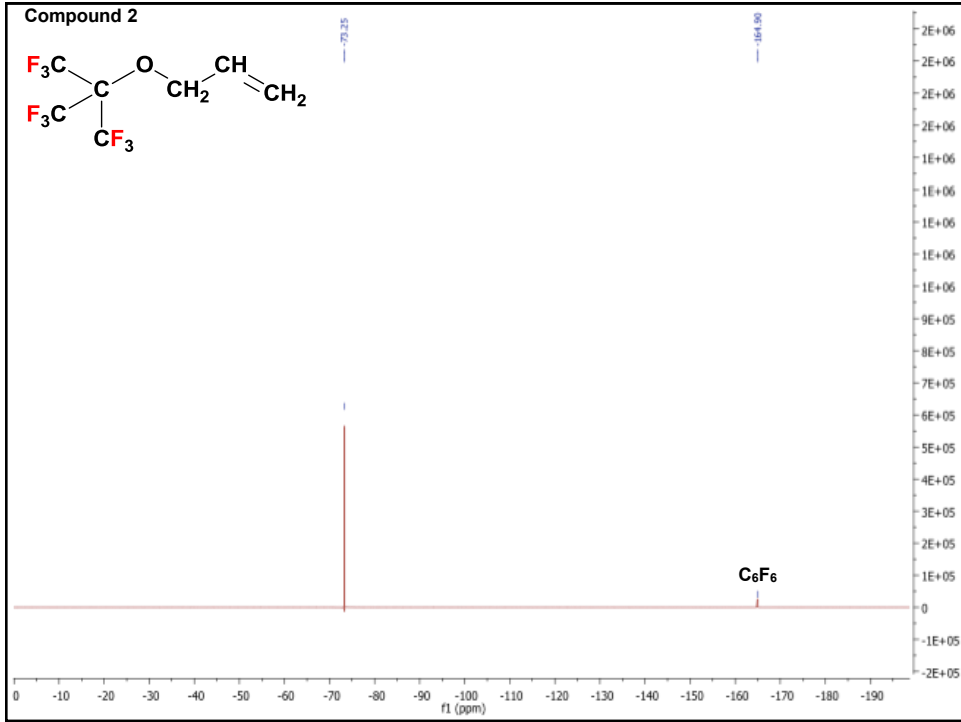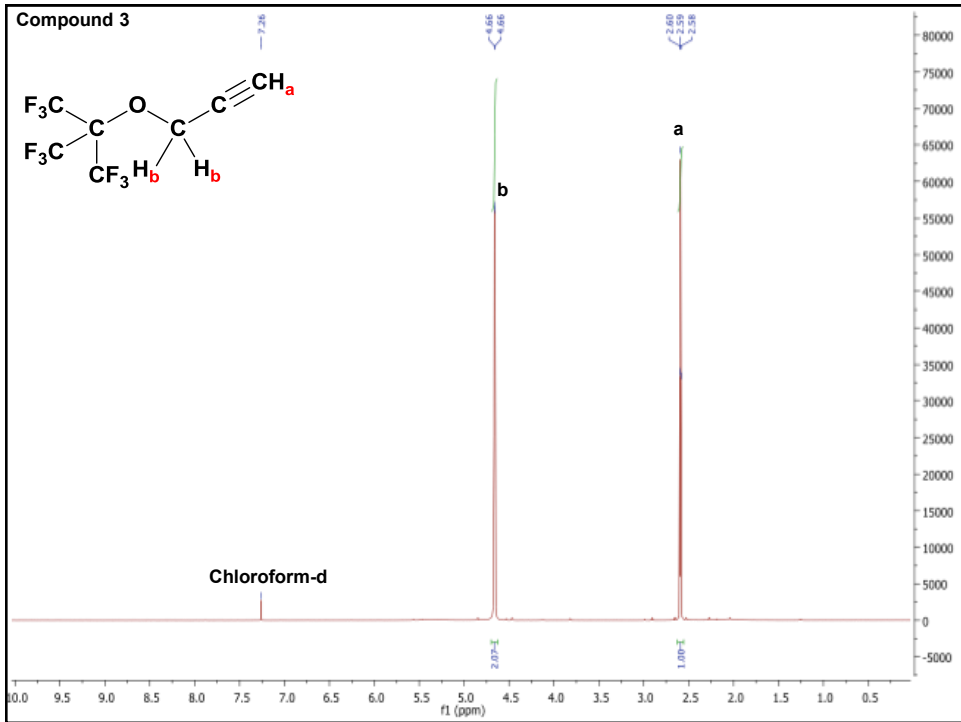

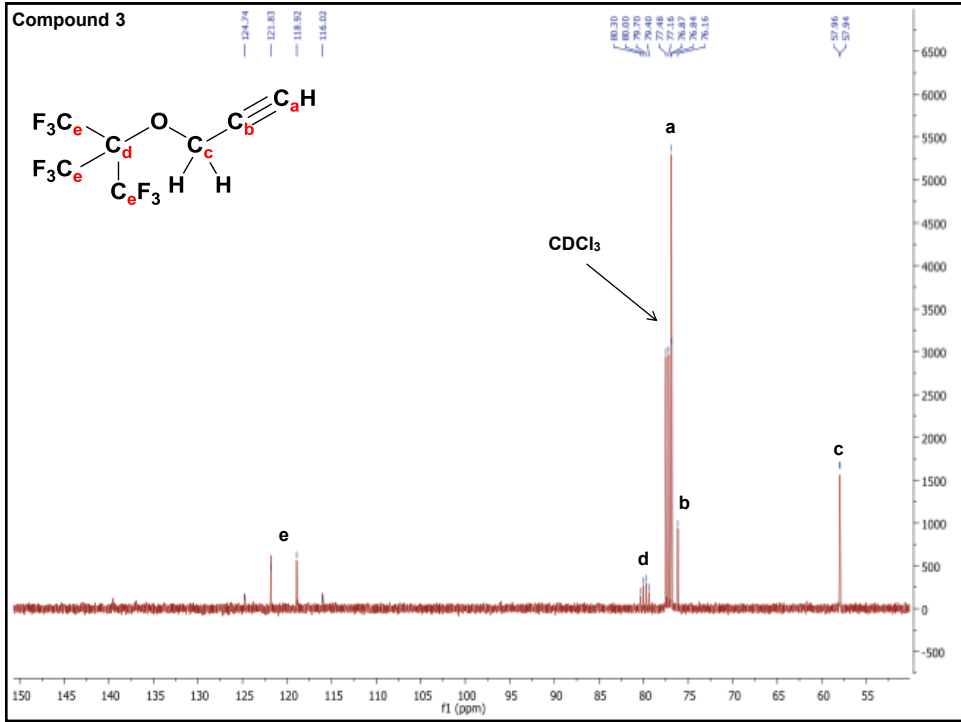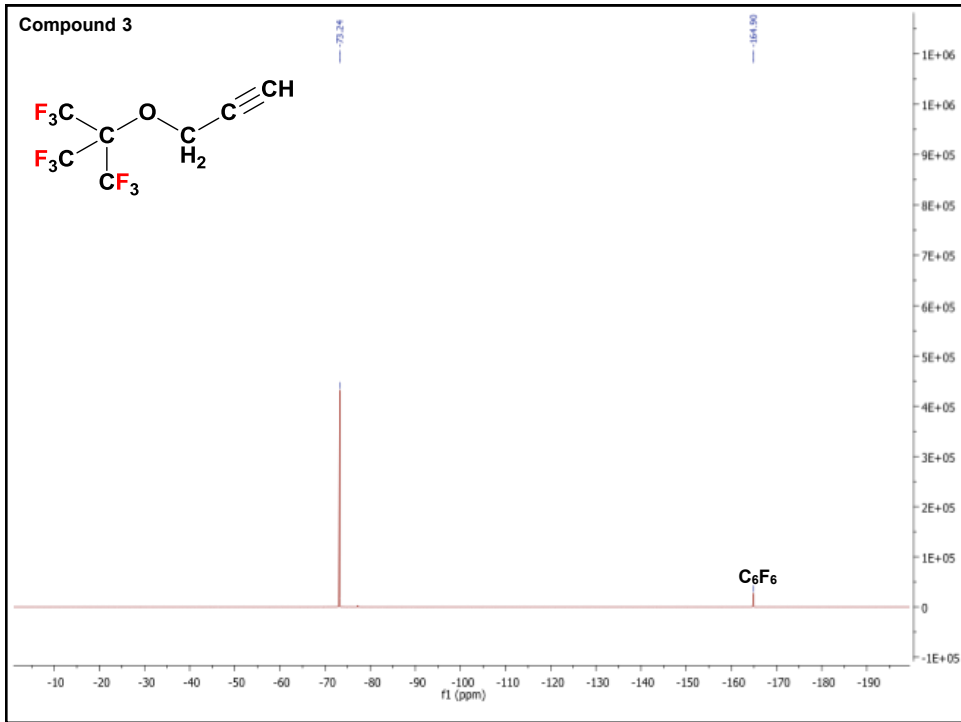

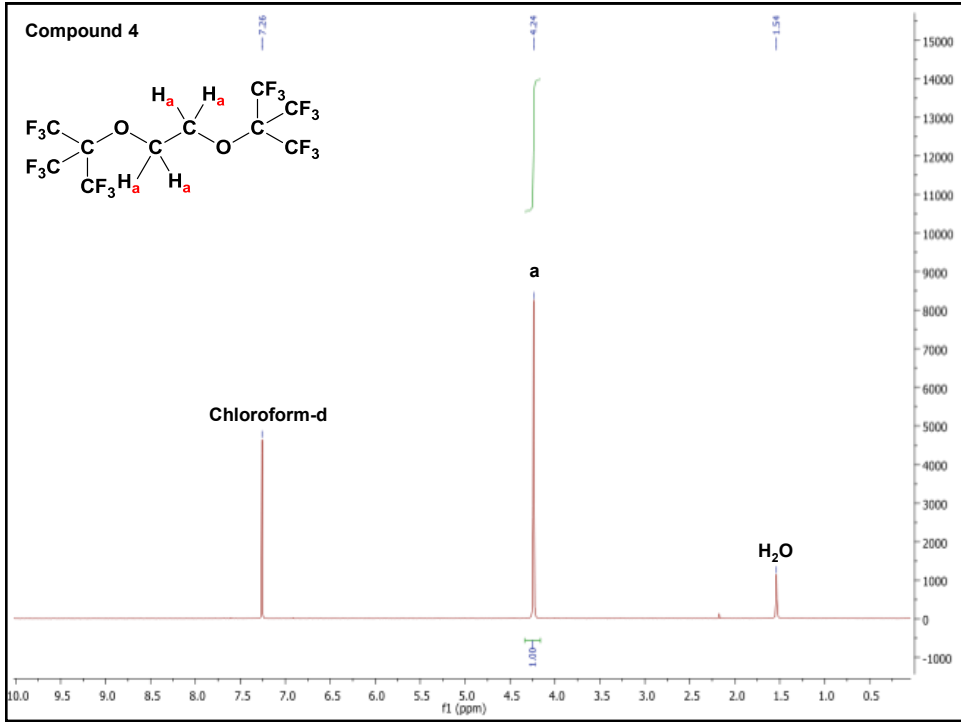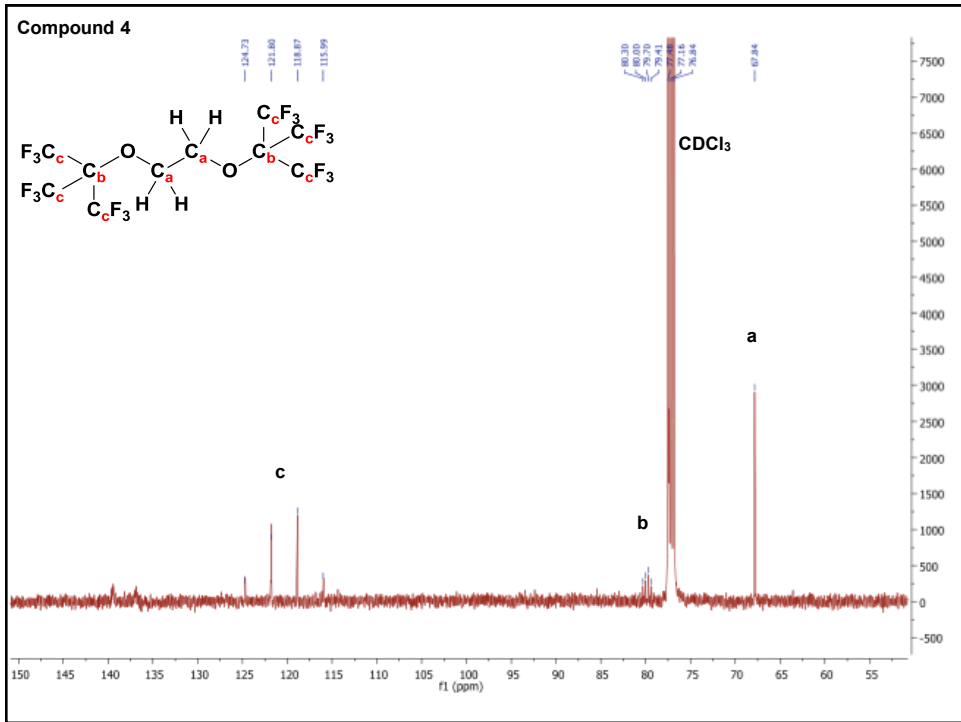

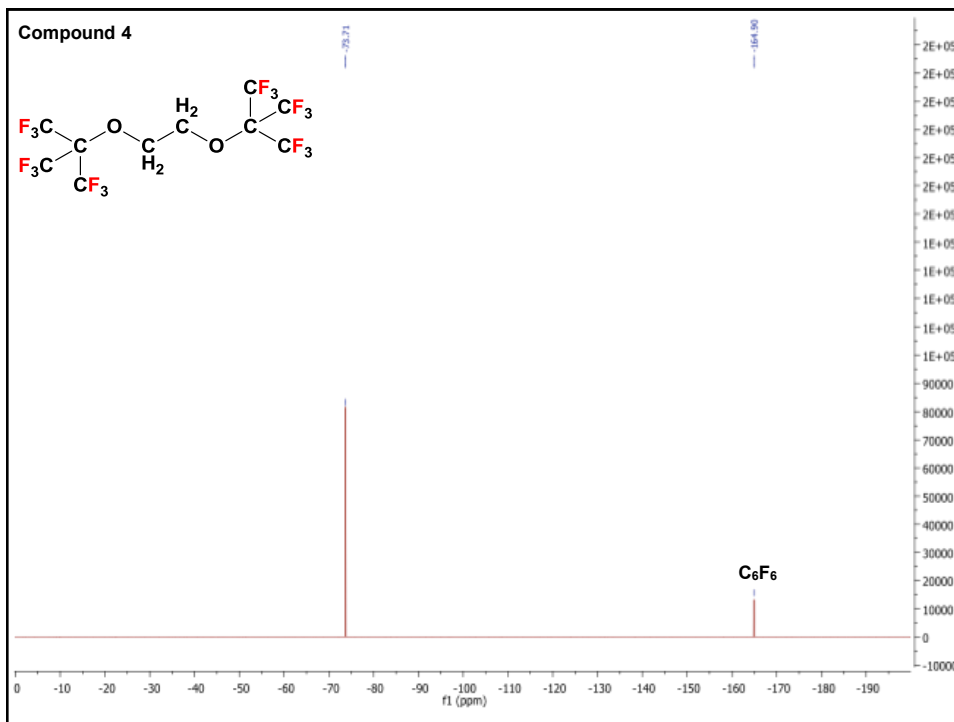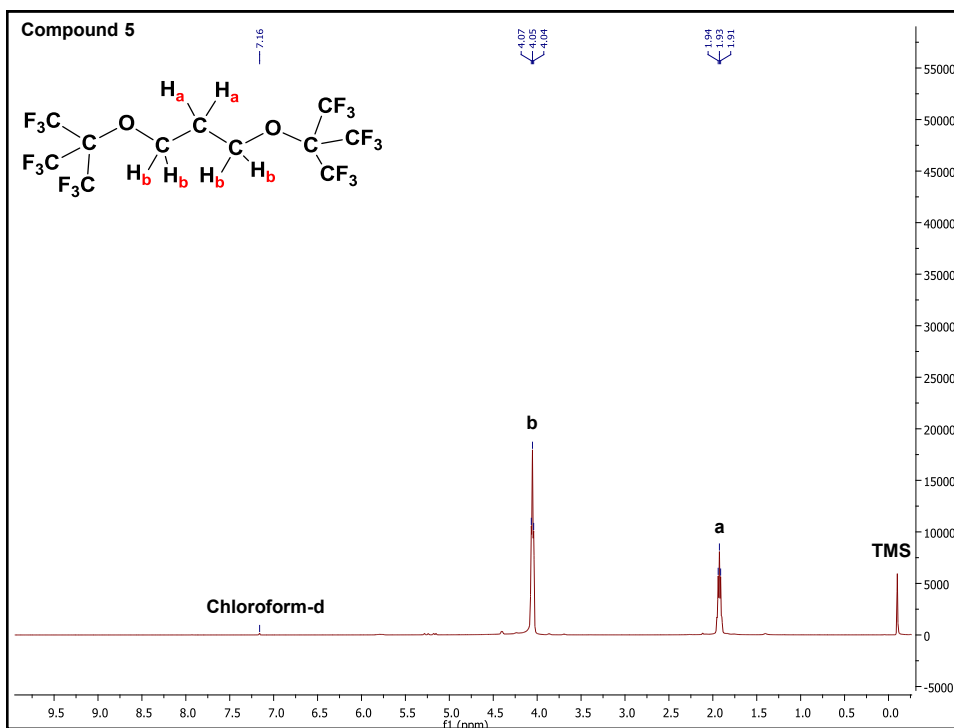

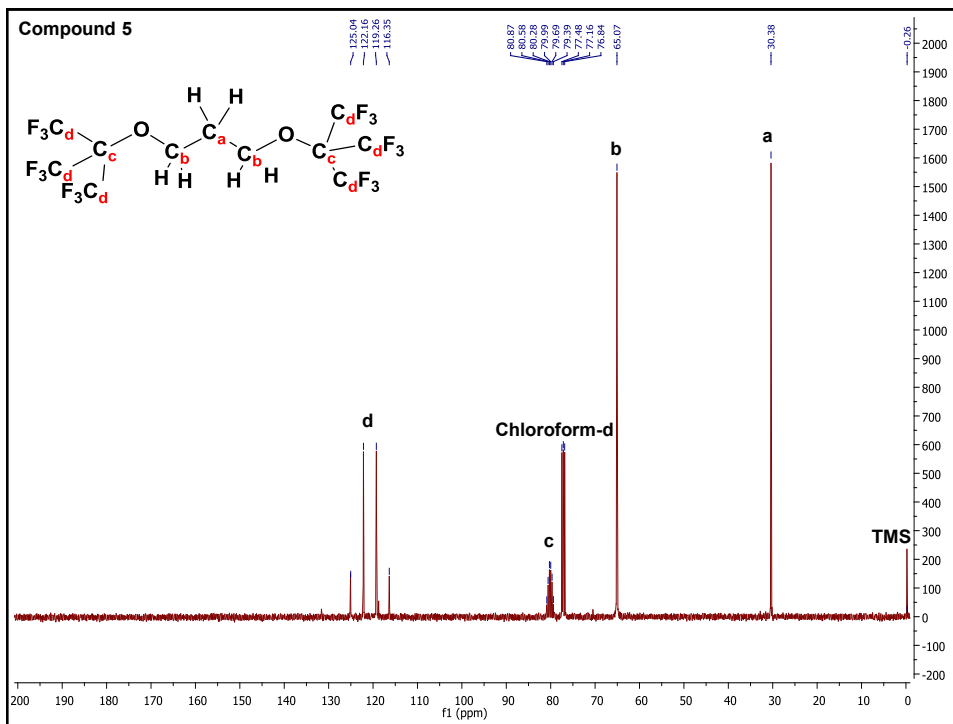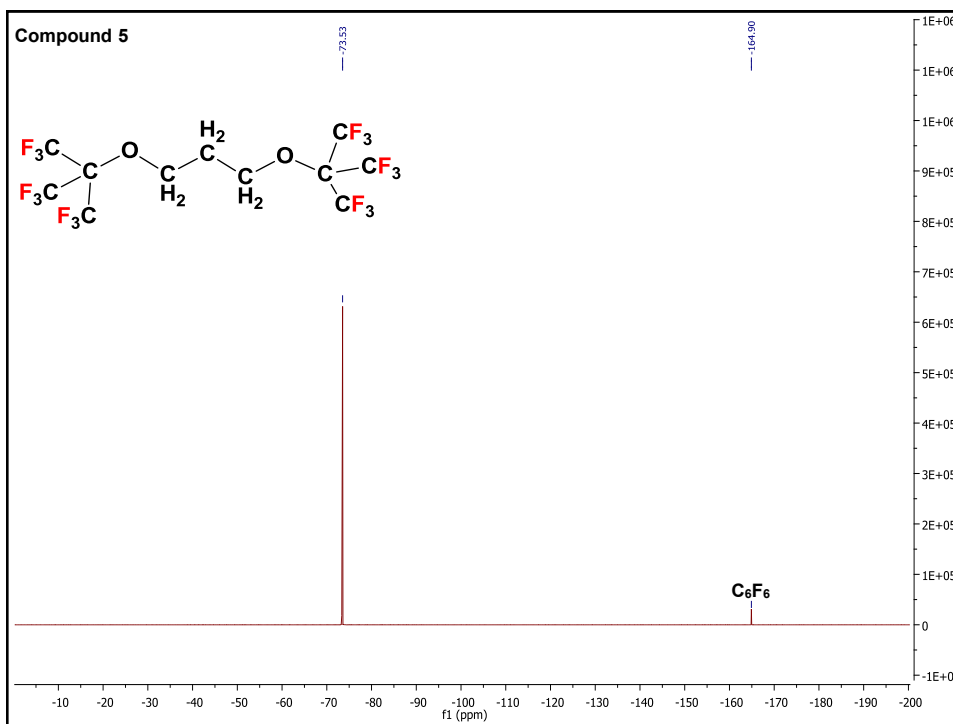



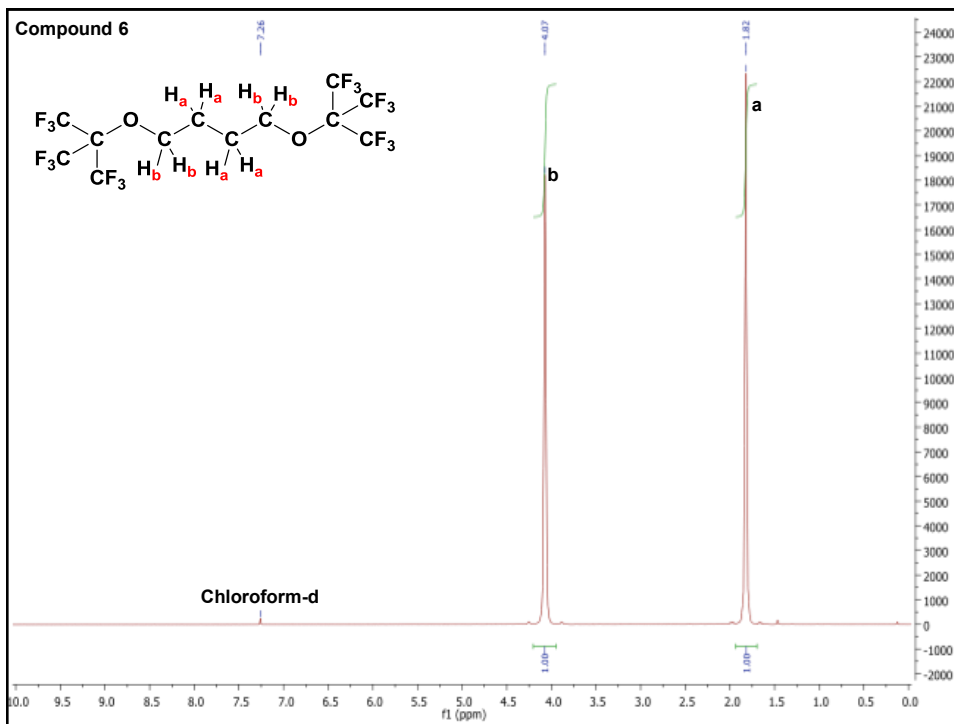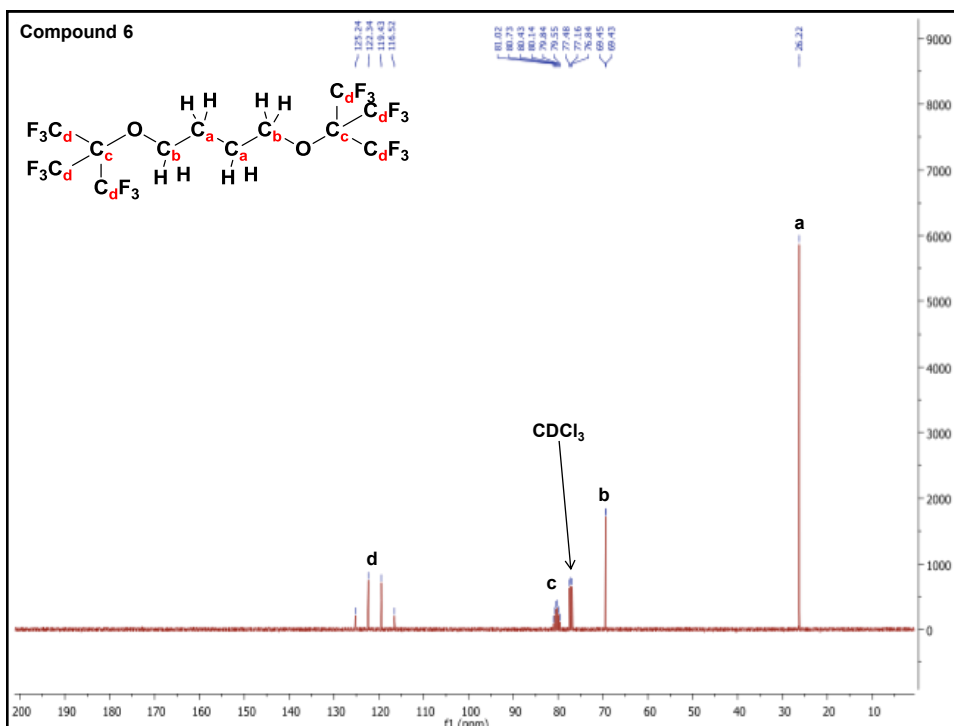

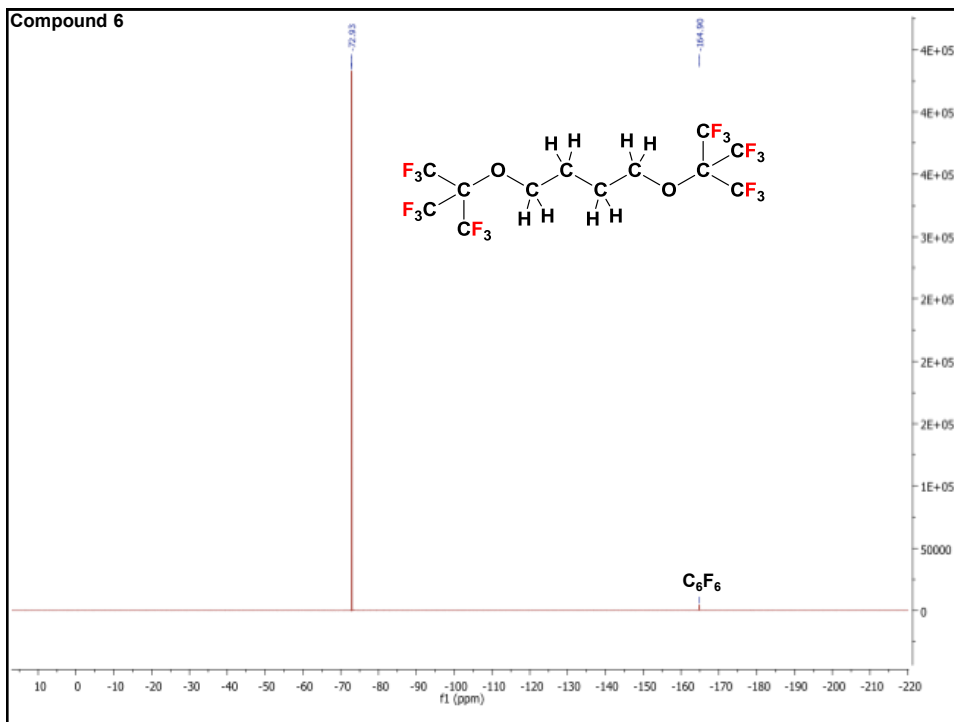

Supplement: c4qo00192c1.pdf [file c4qo00192c1.pdf]
